# Supplementary material for: Synthesis, X-ray Crystal Structure, and Computational Characterization of Tetraphenylborate, 3-(5H-Dibenzo[a,d] cyclohepten-5-ylidene)-N, N-Dimethyl-1-propanamine
Source: MDPI journal article supplement (doi:10.3390/cryst13071088), 2023-07-12
Supplement: s1 [file s1]

Supported information

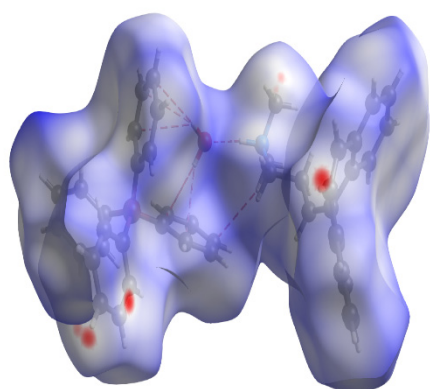

Overall  
surface

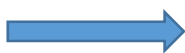

100%

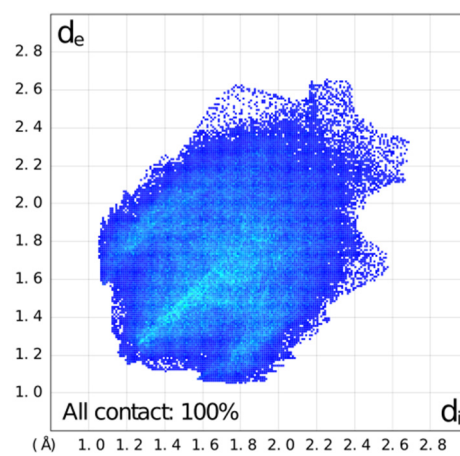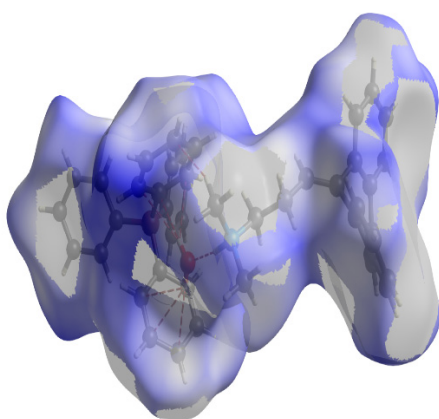

H...H

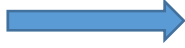

69.4%

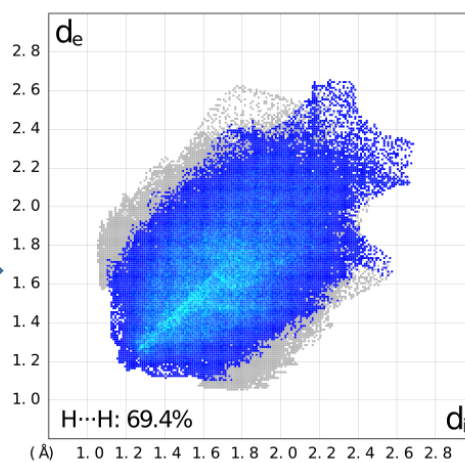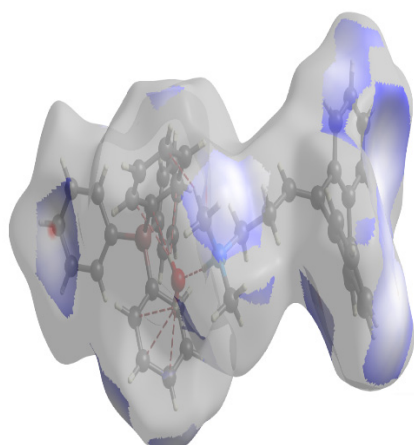

H...C/ C...H

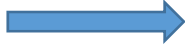

28.0%

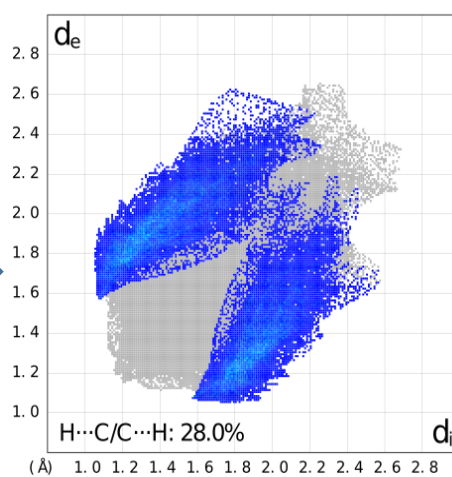

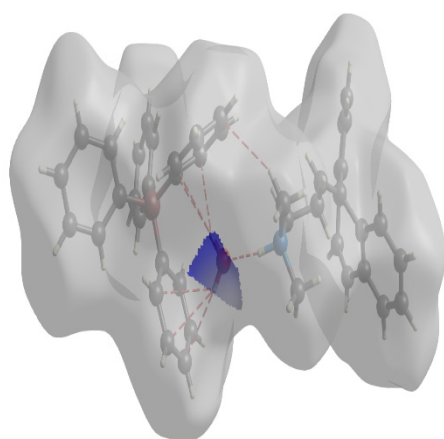

$\text{H}\cdots\text{O}/\text{O}\cdots\text{H}$   
 0.8 %

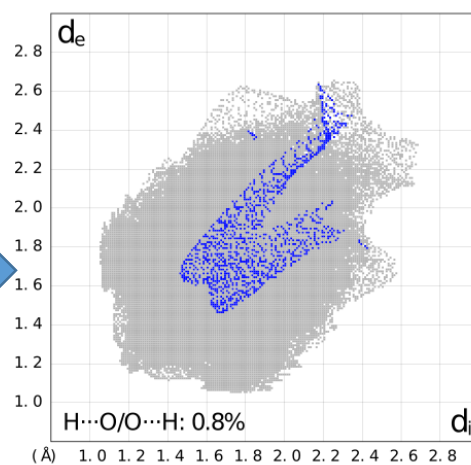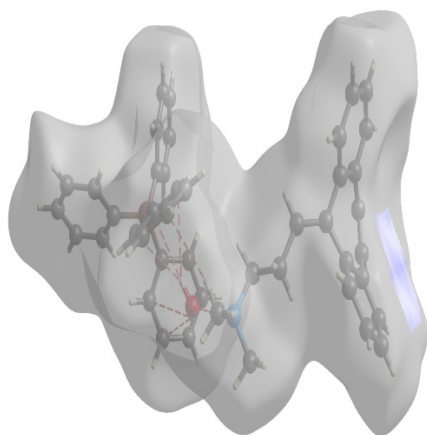

$\text{C}\cdots\text{C}$   
 1.7 %

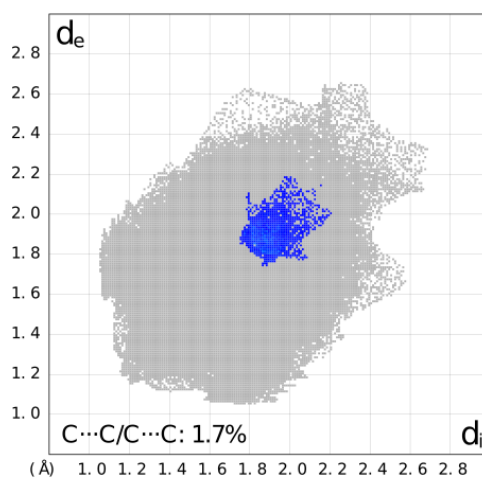

Figure S1 : Over all, the surface structure of the complex
