# Supplementary material for: Synthesis, X-ray Crystal Structure, and Computational Characterization of Tetraphenylborate, 3-(5H-Dibenzo[a,d] cyclohepten-5-ylidene)-N, N-Dimethyl-1-propanamine
Source: MDPI journal article supplement (doi:10.3390/cryst13071088), 2023-07-12
Supplement: s1 [file s1]

Archive with 1 entries (1 files):
- crystals-2499926-supplementary.pdf
